# Supplementary material for: RSC and GRFs confer promoter directionality by restricting divergent noncoding transcription
Source: PubMed Central journal article supplement (PMC9481977; doi:10.26508/lsa.202201394), 2022-09-16

Figure 1A

A

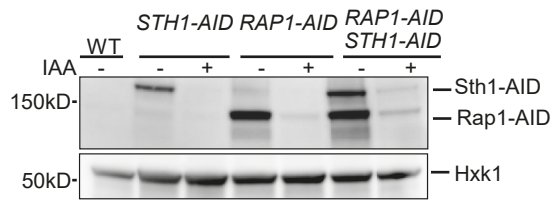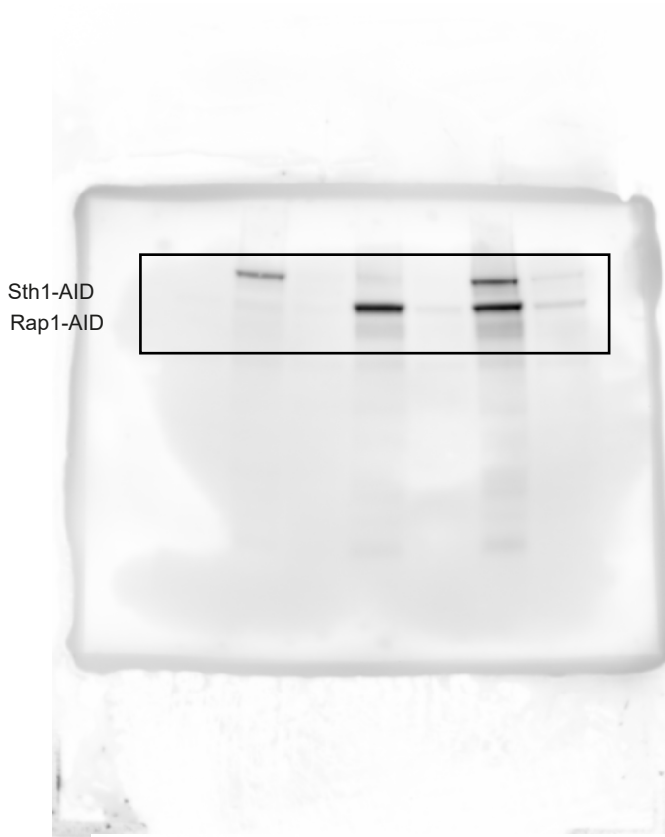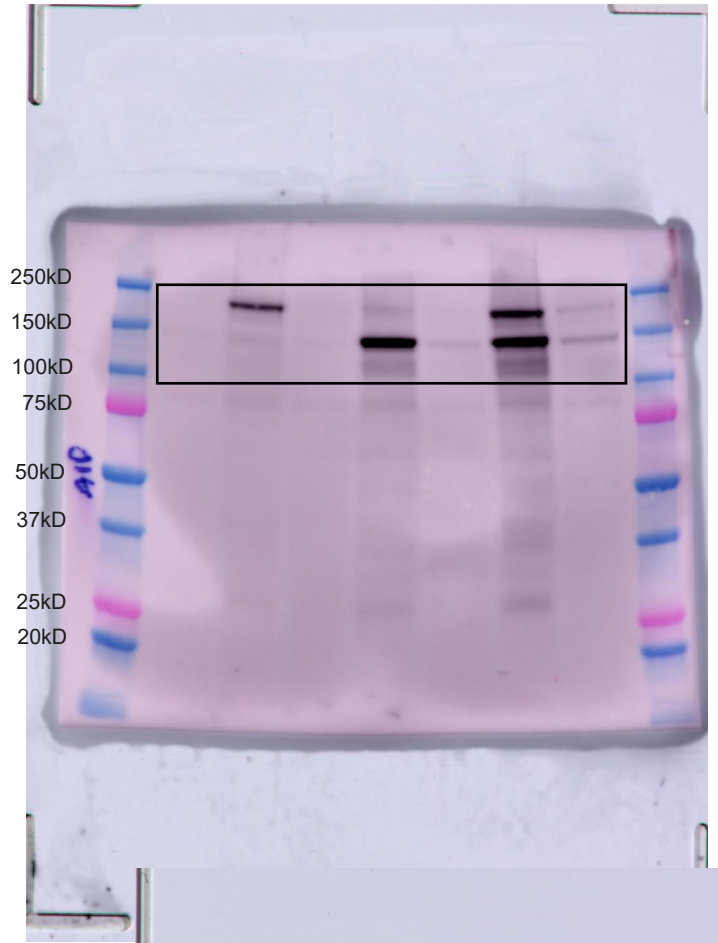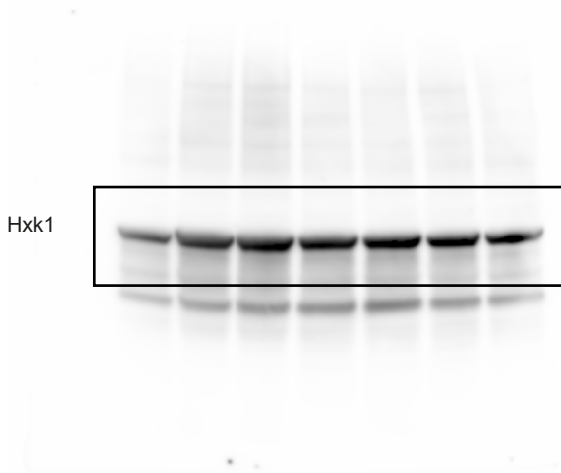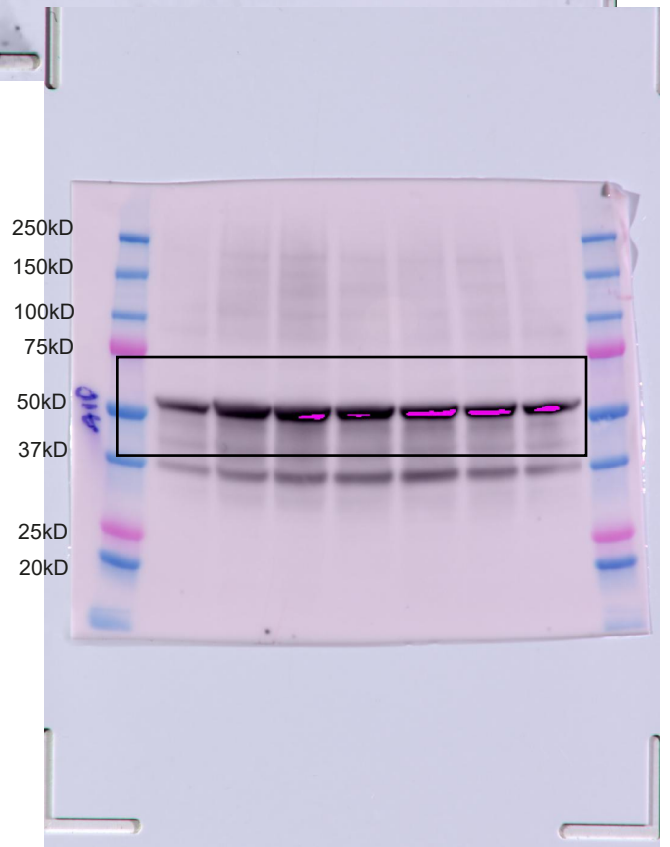

Supplement: LSA-2022-01394_SdataF1.pdf [file LSA-2022-01394_SdataF1.pdf]
