# Supplementary material for: RSC and GRFs confer promoter directionality by restricting divergent noncoding transcription
Source: PubMed Central journal article supplement (PMC9481977; doi:10.26508/lsa.202201394), 2022-09-16
Supplement: LSA-2022-01394_TableS2.pdf [file LSA-2022-01394_TableS2.pdf]

**Table S2. Genotypes of strains used in this study**

| <b>Strain Number</b> | <b>Genotype</b>                                                                                                                                    |
|----------------------|----------------------------------------------------------------------------------------------------------------------------------------------------|
| FW7228               | <i>MATa his3Δ1 leu2Δ0 met15Δ0 ura3Δ0 rpb3::RPB3-3xFLAG::NATMX</i>                                                                                  |
| FW7220               | <i>MATa his3Δ1 leu2Δ0 met15Δ0 ura3Δ0 rpb3::RPB3-3xFLAG::NATMX<br/>leu2::pGPD1-osTIR1::LEU2 sth1::STH1-V5-AID::KANMX6</i>                           |
| FW7232               | <i>MATa his3Δ1 leu2Δ0 met15Δ0 ura3Δ0 rpb3::RPB3-3xFLAG::NATMX<br/>leu2::pGPD1-osTIR1::LEU2 rap1::RAP1-V5-AID::KANMX6 sth1::STH1-V5-AID::KANMX6</i> |
| FW7238               | <i>MATa his3Δ1 leu2Δ0 met15Δ0 ura3Δ0 rpb3::RPB3-3xFLAG::NATMX<br/>leu2::pGPD1-osTIR1::LEU2 rap1::RAP1-V5-AID::KANMX6</i>                           |
| FW6404               | <i>MATa his3Δ1 leu2Δ0 met15Δ0 ura3Δ0<br/>ppt1::p615-YFP-Cbf1_bs-pPPT1-mCherry::NATMX6</i>                                                          |
| FW6306               | <i>MATa his3Δ1 leu2Δ0 met15Δ0 ura3Δ0 cbf1::KANMX<br/>ppt1::p615-YFP-Cbf1_bs-pPPT1-mCherry::NATMX6</i>                                              |
| FW6401               | <i>MATa his3Δ1 leu2Δ0 met15Δ0 ura3Δ0<br/>ppt1::p612-YFP-Gcn4_bs-pPPT1-mCherry::NATMX6</i>                                                          |
| FW6300               | <i>MATa his3Δ1 leu2Δ0 met15Δ0 ura3Δ0 gcn4::KANMX<br/>ppt1::p612-YFP-Gcn4_bs-pPPT1-mCherry::NATMX6</i>                                              |
| FW6402               | <i>MATa his3Δ1 leu2Δ0 met15Δ0 ura3Δ0<br/>ppt1::p613-YFP-Cat8_bs-pPPT1-mCherry::NATMX6</i>                                                          |
| FW6302               | <i>MATa his3Δ1 leu2Δ0 met15Δ0 ura3Δ0 cat8::KANMX<br/>ppt1::p613-YFP-Cat8_bs-pPPT1-mCherry::NATMX6</i>                                              |
| FW6403               | <i>MATa his3Δ1 leu2Δ0 met15Δ0 ura3Δ0<br/>ppt1::p614-YFP-Gal4_bs-pPPT1-mCherry::NATMX6</i>                                                          |
| FW6424               | <i>MATa his3Δ1 leu2Δ0 met15Δ0 ura3Δ0 gal4::KANMX<br/>ppt1::p614-YFP-Gal4_bs-pPPT1-mCherry::NATMX6</i>                                              |
| FW6405               | <i>MATa his3Δ1 leu2Δ0 met15Δ0 ura3Δ0<br/>ppt1::p616-YFP-Gcr1_bs-pPPT1-mCherry::NATMX6</i>                                                          |
| FW6315               | <i>MATa his3Δ1 leu2Δ0 met15Δ0 ura3Δ0 gcr1::KANMX<br/>ppt1::p616-YFP-Gcr1_bs-pPPT1-mCherry::NATMX6</i>                                              |
| FW6415               | <i>MATa his3Δ1 leu2Δ0 met15Δ0 ura3Δ0 abf1::ABF1-V5-IAA7::KANMX6<br/>leu2::pGPD1-osTIR1::LEU2<br/>ppt1::p619-YFP-Abf1_bs-pPPT1-mCherry::NATMX6</i>  |

|        |                                                                                                                                                                                                          |
|--------|----------------------------------------------------------------------------------------------------------------------------------------------------------------------------------------------------------|
| FW6411 | <i>MATa his3Δ1 leu2Δ0 met15Δ0 ura3Δ0</i><br><i>reb1::REB1-V5-IAA7::KANMX6 leu2::pGPD1-osTIR1::LEU2</i><br><i>ppt1::p620-YFP-Reb1_bs-pPPT1-mCherry::NATMX6</i>                                            |
| FW6407 | <i>MATa his3Δ1 leu2Δ0 met15Δ0 ura3Δ0</i><br><i>ppt1::p592-YFP-pPPT1-mCherry::NATMX6</i>                                                                                                                  |
| FW629  | <i>MATa his3Δ1 leu2Δ0 met15Δ0 ura3Δ0</i>                                                                                                                                                                 |
| FW8477 | <i>MATa his3Δ1 leu2Δ0 met15Δ0 ura3Δ0</i><br><i>rap1::RAP1-V5-IAA7::KANMX6 his3::pGPD1-osTIR1::HIS3</i><br><i>ura3::p375::URA3</i>                                                                        |
| FW8523 | <i>MATa his3Δ1 leu2Δ0 met15Δ0 ura3Δ0</i><br><i>rap1::RAP1-V5-IAA7::KANMX6 his3::pGPD1-osTIR1::HIS3</i><br><i>ura3::p704::pTDH3-dCas9-3xFLAG-ADH1term::URA3</i><br><i>p692::pRS305-pSNR52-sgIRT2</i>      |
| FW8531 | <i>MATa his3Δ1 leu2Δ0 met15Δ0 ura3Δ0</i><br><i>rap1::RAP1-V5-IAA7::KANMX6 his3::pGPD1-osTIR1::HIS3</i><br><i>ura3::p703::pTDH3-dCas9-Mxi1-3xFLAG-ADH1term::URA3</i><br><i>p692::pRS305-pSNR52-sgIRT2</i> |
| FW8527 | <i>MATa his3Δ1 leu2Δ0 met15Δ0 ura3Δ0</i><br><i>rap1::RAP1-V5-IAA7::KANMX6 his3::pGPD1-osTIR1::HIS3</i><br><i>ura3::p703::pTDH3-dCas9-3xFLAG-ADH1term::URA3</i><br><i>p705::pRS305-pSNR52-sgTEF1</i>      |
| FW8535 | <i>MATa his3Δ1 leu2Δ0 met15Δ0 ura3Δ0</i><br><i>rap1::RAP1-V5-IAA7::KANMX6 his3::pGPD1-osTIR1::HIS3</i><br><i>ura3::p703::pTDH3-dCas9-Mxi1-3xFLAG-ADH1term::URA3</i><br><i>p352::pRS305-pSNR52-sgTEF1</i> |
| FW8529 | <i>MATa his3Δ1 leu2Δ0 met15Δ0 ura3Δ0</i><br><i>rap1::RAP1-V5-IAA7::KANMX6 his3::pGPD1-osTIR1::HIS3</i><br><i>ura3::p703::pTDH3-dCas9-Mxi1-3xFLAG-ADH1term::URA3</i><br><i>p706::pRS305-pSNR52-sgMLP1</i> |
