# Supplementary material for: RSC and GRFs confer promoter directionality by restricting divergent noncoding transcription
Source: PubMed Central journal article supplement (PMC9481977; doi:10.26508/lsa.202201394), 2022-09-16
Supplement: LSA-2022-01394_TableS3.pdf [file LSA-2022-01394_TableS3.pdf]

**Table S3. Plasmids used in this study.**

| <b>plasmid number</b> | <b>plasmid name</b>                             |
|-----------------------|-------------------------------------------------|
| 592                   | <i>YFP-pPPT1-mCherry::NATMX6</i>                |
| 615                   | <i>YFP-Cbf1_bs-pPPT1-mCherry::NATMX6</i>        |
| 612                   | <i>YFP-Gcn4_bs-pPPT1-mCherry::NATMX6</i>        |
| 613                   | <i>YFP-Cat8_bs-pPPT1-mCherry::NATMX6</i>        |
| 614                   | <i>YFP-Gal4_bs-pPPT1-mCherry::NATMX6</i>        |
| 616                   | <i>YFP-Gcr1_bs-pPPT1-mCherry::NATMX6</i>        |
| 619                   | <i>YFP-Abf1_bs-pPPT1-mCherry::NATMX6</i>        |
| 620                   | <i>YFP-Reb1_bs-pPPT1-mCherry::NATMX6</i>        |
| 706                   | <i>pRS305-pSNR52-sgMLP1</i>                     |
| 247                   | <i>pL243 (plasmid expression TIR1 ligase)</i>   |
| 227                   | <i>pWG444 (plasmid for making NAT deletion)</i> |
| 627                   | <i>3xFLAG-NATMX</i>                             |
| 704                   | <i>pTDH3-dCas9-3xFLAG-ADH1term</i>              |
| 703                   | <i>pTDH3-dCas9-Mxi1-3xFLAG-ADH1term</i>         |
| 692                   | <i>pRS305-pSNR52-sgIRT2</i>                     |
| 352                   | <i>pRS305-pSNR52-sgTEF1</i>                     |
| 252                   | <i>pFA6A-V5-IAA7::KANMX6</i>                    |
