# Supplementary material for: RSC and GRFs confer promoter directionality by restricting divergent noncoding transcription
Source: PubMed Central journal article supplement (PMC9481977; doi:10.26508/lsa.202201394), 2022-09-16
Supplement: LSA-2022-01394_TableS4.pdf [file LSA-2022-01394_TableS4.pdf]

**Table S4.** Oligo nucleotide sequences used in this study

|                   |                                                                 |                                                                                  |
|-------------------|-----------------------------------------------------------------|----------------------------------------------------------------------------------|
| IME1_NB_probe_R   | ATGCAACGCCTACTTGTTTT                                            | <i>IRT2</i> northern blot probe                                                  |
| IME1_NB_probe_F   | GATGGAGGGTTGGCATAAAA                                            | <i>IRT2</i> northern blot probe                                                  |
| SNR190_NB_probe_F | GGCCCTGATGATAATG                                                | <i>SNR190</i> northern blot probe                                                |
| SNR190_NB_probe_R | GGCTCAGATCTGCATG                                                | <i>SNR190</i> northern blot probe                                                |
| IRT2_RT_F         | GACATCCGCATTCTTGCAGC                                            | <i>IRT2</i> for RT-qPCR                                                          |
| IRT2_RT_R         | CATGCTGTTCTTTCCGCCAC                                            | <i>IRT2</i> for RT-qPCR                                                          |
| ACT1_RT_F         | GTACCACCATGTTCCCAGGTATT                                         | <i>ACT1</i> RT-qPCR                                                              |
| ACT1_RT_R         | AGATGGACCACTTTCGTCGT                                            | <i>ACT1</i> RT-qPCR                                                              |
| IRT2_gRNA_F       | <b>ATGATATGTAG</b> TTTTAGAGCTAGAAATA<br>GCAAGTAAA               | <i>IRT2</i> gRNA primer for cloning,<br>highlighted is the gRNA sequence<br>used |
| IRT2_gRNA_R       | <b>TTAGATTATT</b> GATCATTATCTTTCACTG<br>CGGA                    | <i>IRT2</i> gRNA primer for cloning,<br>highlighted is the gRNA sequence<br>used |
| MLP1_gRNA_F       | <b>GAGGCACGGAG</b> TTTTAGAGCTAGAAAT<br>AGCAAGTAAA               | <i>MLP1</i> gRNA primer for cloning,<br>highlighted is the gRNA sequence<br>used |
| MLP1_gRNA_R       | <b>TAATAGATTT</b> GATCATTATCTTTCACT<br>GCGGA                    | <i>MLP1</i> gRNA primer for cloning,<br>highlighted is the gRNA sequence<br>used |
| Reb1bs_top        | TCGGGTAACCTATCGGGTAACAT                                         | Oligo used for cloning Reb1<br>binding site                                      |
| Reb1bs_bottom     | ATGTTACCCGATAAGTTACCCGA                                         | Oligo used for cloning Reb1<br>binding site                                      |
| Abf1bs_top        | TTATCACTTCCCACGATTATCACTTCCC<br>ACGATT                          | Oligo used for cloning Abf1<br>binding site                                      |
| Abf1bs_bottom     | AATCGTGGGAAGTGATAATCGTGGGAA<br>GTGATAA                          | Oligo used for cloning Abf1<br>binding site                                      |
| Gal4bs_top        | ACGGATTAGAAGCCGCGAGCGGGCG<br>ACAGCCCTCCGACGGAAGACTCTCCTC<br>CGT | Oligo used for cloning Gal4<br>binding site                                      |
| Gal4bs_bottom     | ACGGAGGAGAGTCTTCCGTCCGAGGG<br>CTGTGCCCGCTCGGCGGCTTCTAATC<br>CGT | Oligo used for cloning Gal4<br>binding site                                      |

|               |                                          |                                          |
|---------------|------------------------------------------|------------------------------------------|
| Gcn4bs_top    | TATGACTCATTCTATGACTCATTTC                | Oligo used for cloning Gcn4 binding site |
| Gcn4bs_bottom | GAATGAGTCATAGAATGAGTCATA                 | Oligo used for cloning Gcn4 binding site |
| Cbf1bs_top    | T CACGTGA TCACGTGA T CACGTGA             | Oligo used for cloning Cbf1 binding site |
| Cbf1bs_bottom | TCACGTG ATCACGTGA TCACGTG A              | Oligo used for cloning Cbf1 binding site |
| Gcr1bs_top    | TGGAAGCCTTGGAAGCCTTGGAAGCCT              | Oligo used for cloning Gcr1 binding site |
| Gcr1bs_bottom | AGGCTTCCAAGGCTTCCAAGGCTTCCA              | Oligo used for cloning Gcr1 binding site |
| Cat8bs_top    | CCTTTAAGCCGACCTTTAAGCCGACCTT<br>TAAGCCGA | Oligo used for cloning Cat8 binding site |
| Cat8bs_bottom | TCGGCTTAAAGGTCGGCTTAAAGGTCG<br>GCTTAAAGG | Oligo used for cloning Cat8 binding site |
